# Supplementary material for: Phenotypic and Functional Properties of Human Steady State CD14+ and CD1a+ Antigen Presenting Cells and Epidermal Langerhans Cells
Source: PubMed Central journal article supplement (PMC4659545; doi:10.1371/journal.pone.0143519), 2015-11-25
Supplement: pone.0143519.s001.pdf [file pone.0143519.s001.pdf]

## S1 Supporting information.

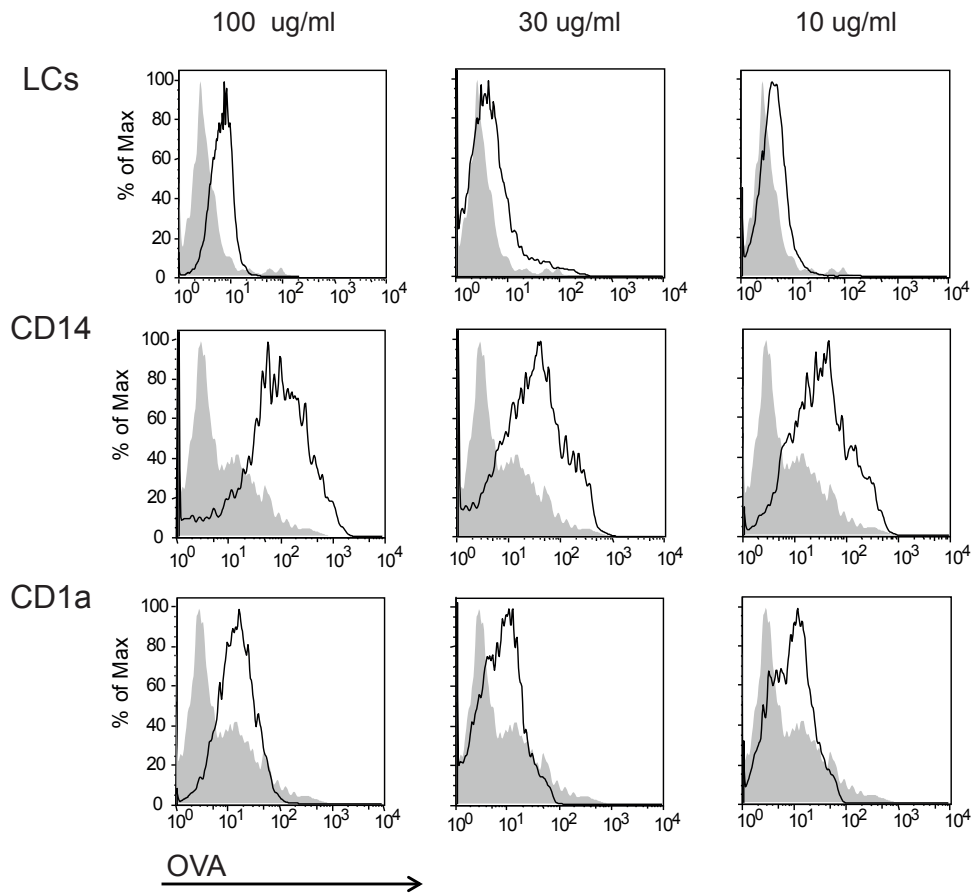

**S1 Fig 1. Antigen internalization by steady state human skin APC subsets.**

Internalization of fluorescently labeled OVA by the isolated skin APC subsets after 2 h as measured by flow cytometry. Data of one representative experiment are shown (n=3) filled histograms: unstained APCs, line histograms: OVA-AF549.
